# Supplementary material for: Highly efficient removal of hexavalent chromium in aqueous solutionsviachemical reduction of plate-like micro/nanostructured zero valent iron
Source: Royal Society of Chemistry journal article supplement (doi:10.1039/c7ra10846j), 2017-01-01
Supplement: c7ra10846j1.pdf [file c7ra10846j1.pdf]

## Supporting Information

### The Highly Efficient Removal of Hexavalent Chromium in Aqueous Solutions via Chemical Reduction of Plate-like Micro/nanostructured Zero Valent Iron

Shenghong Kang<sup>a, b</sup>, Guozhong Wang<sup>a</sup>, Huijun Zhao<sup>a</sup>, Weiping Cai<sup>a, b\*</sup>

<sup>a</sup> Key Laboratory of Materials Physics, Anhui Key Laboratory of Nanomaterials and Nanotechnology, Center for Environmental and Energy Nanomaterials, Institute of Solid State Physics, Chinese Academy of Sciences, Hefei 230031, P.R. China.

<sup>b</sup> Department of Materials Science and Engineering, University of Science and Technology of China, Hefei 230026, P. R. China

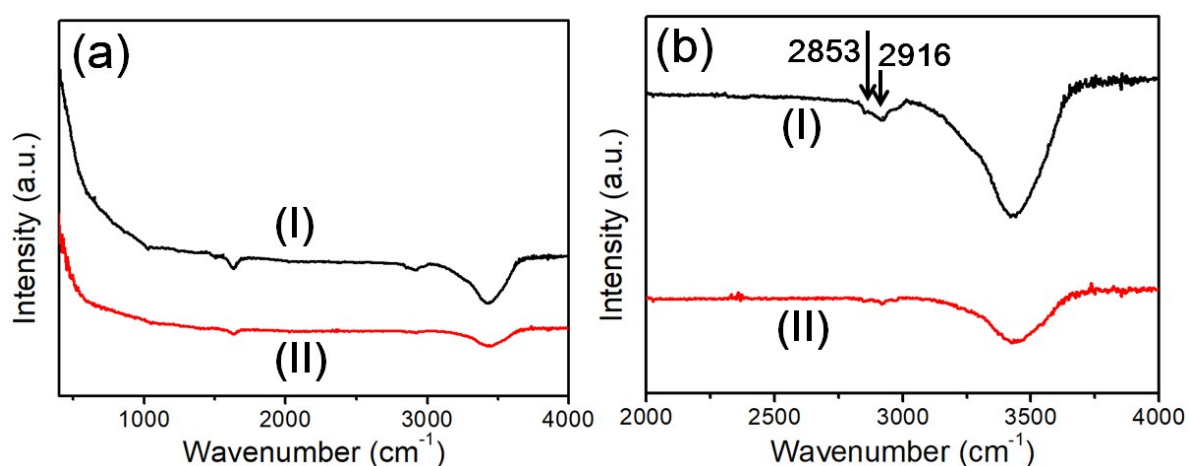

**Figure S1.** The FTIR spectra of the ball-milled powders before (I) and after (II) cleaning with NaOH solution. (b): The magnified figure of (a).

It has been shown that for the ball-milled powders without cleaning there exist the peaks at 2853 cm<sup>-1</sup> and 2919cm<sup>-1</sup> (curve I) which are attributed to C-H stretching bonds from the stearic acid [Ref.1]. After cleaning with NaOH solution, these two peaks basically disappear (curve II).

[Ref.1] C.P. Devatha, A. K. Thalla and S. Y. Katte, *J. Clean. Prod.*, 2016, **139**, 1425-1435.

---

\* To whom all correspondence should be addressed  
E-mail: wpcai@issp.ac.cn

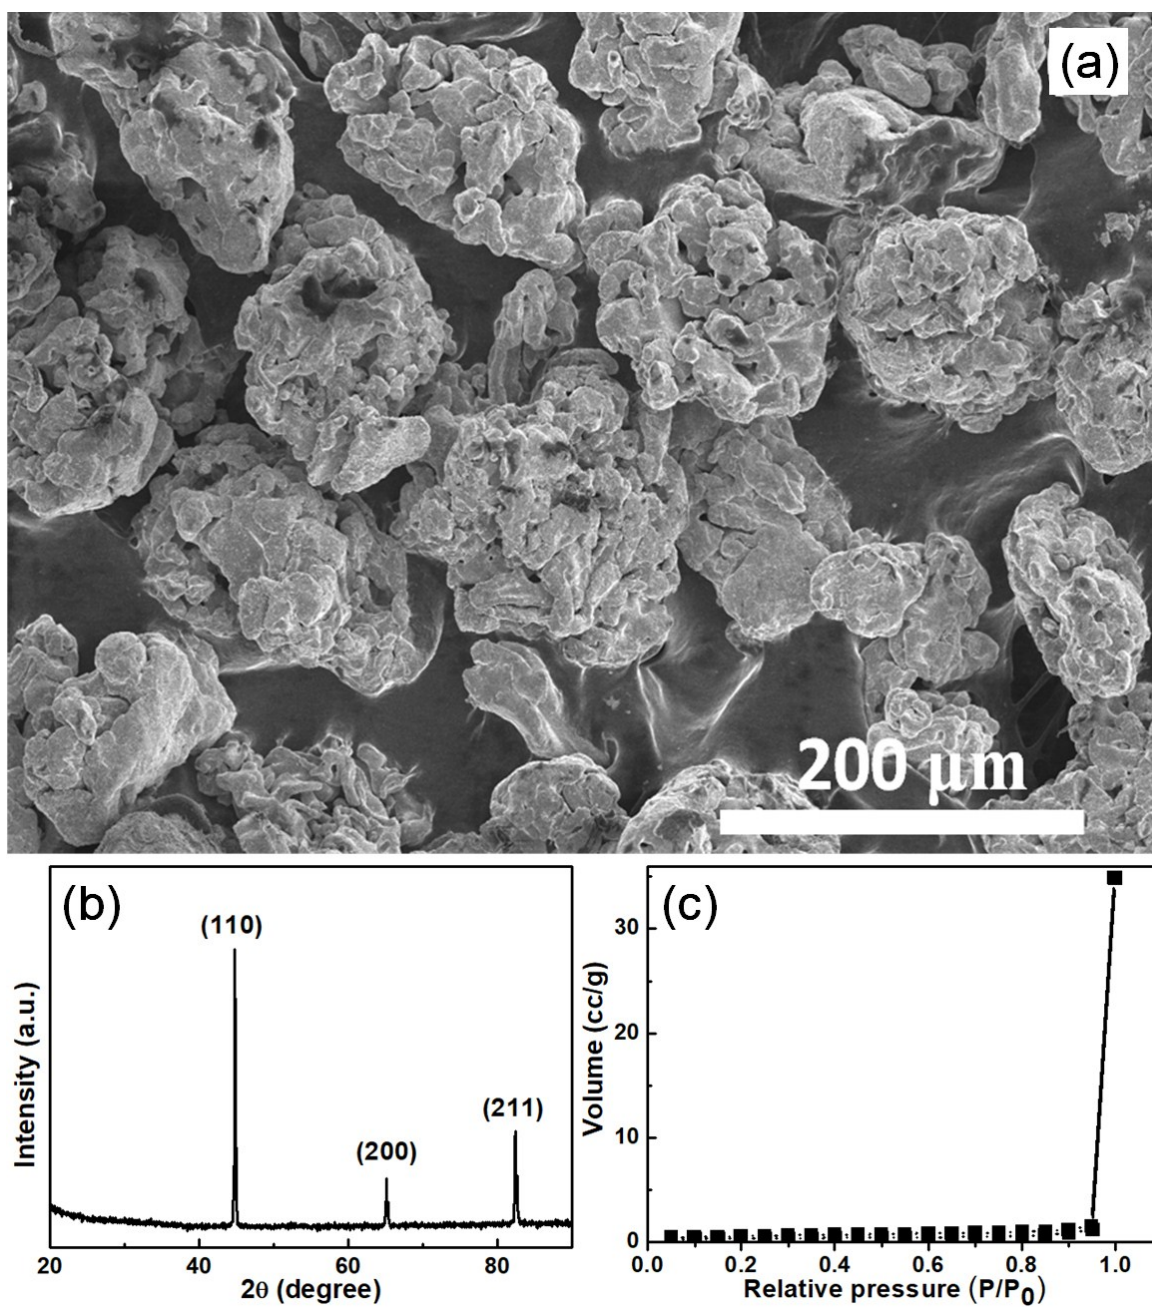

**Figure S2.** The FESEM image (a), the XRD pattern (b) and the nitrogen isotherm (c) of the non-ball milled sample (or the CZVI powders). The indexes in (b) correspond to the diffraction of pure iron.

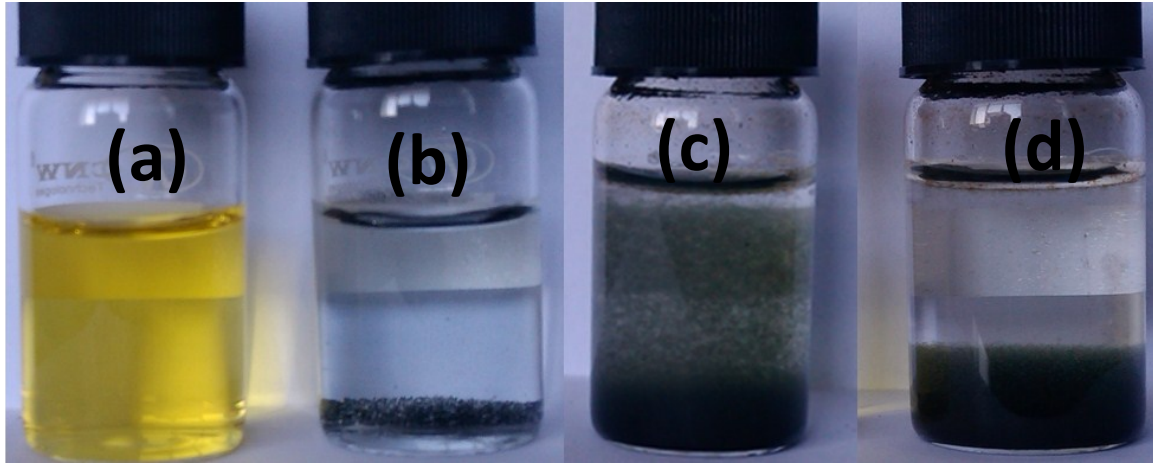

**Figure S3.** The photos of a sample in the different stages. (a): The initial Cr(VI)-contained solution without addition of ZVI. (b): After addition of the plate-like MNZVI for 12min and then magnetic separation. (c): After addition of NaOH (flocculant) into (b); (d) After holding the bottle in (c) for 5 min.

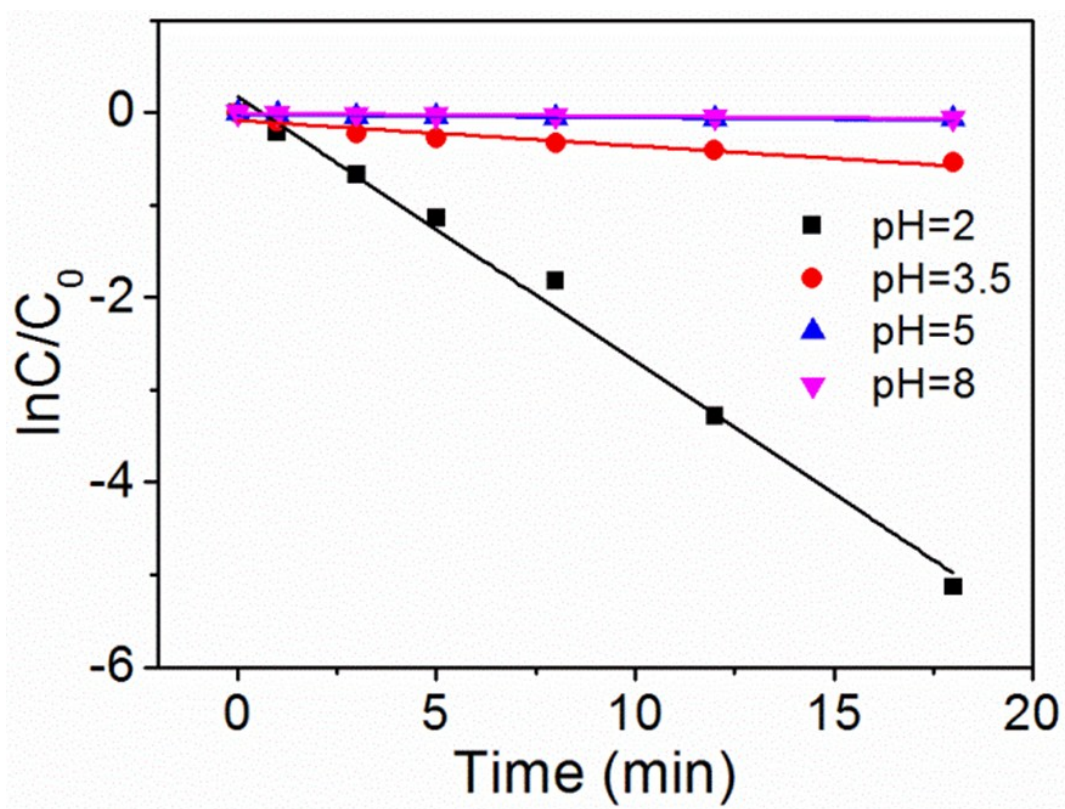

**Figure S4.** The plots of  $\ln[C/C_0]$  vs the reaction time after adding 1.5 g/L ZVI into the solutions with 100 ppm in the initial Cr(VI) content but different initial pH values. The straight lines are the fitting results according to Eq.(1).

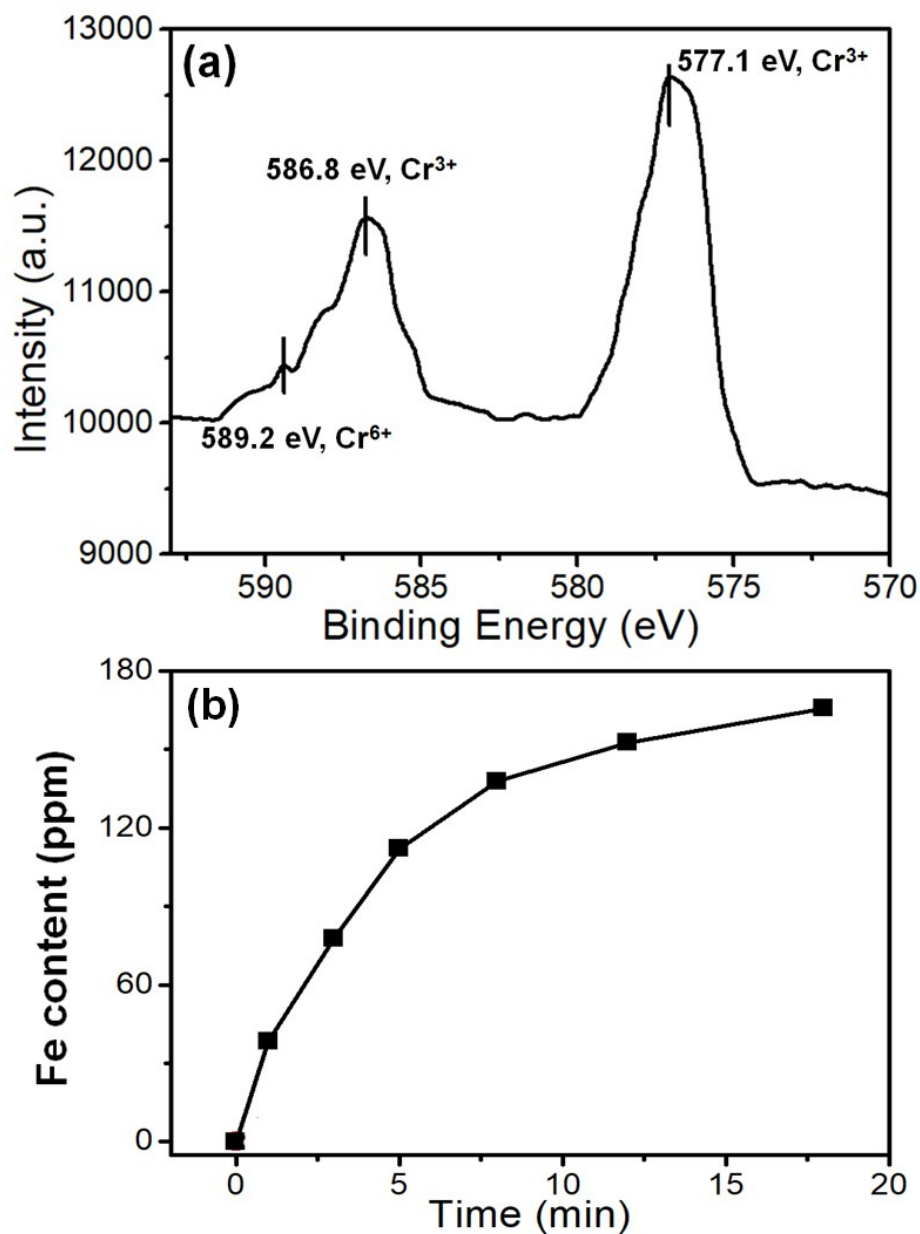

**Figure S5.** (a): The XPS spectrum (Cr2P) for the MNZVI after immersion in the Cr(VI)-contained solution for 18 min. (b): The Fe content in the Cr(VI)-contained solution as a function of the reaction time after the addition of the MNZVI. (The initial Cr(VI) content: 100 ppm; the MNZVI dosage: 1.5 g·L<sup>-1</sup>)

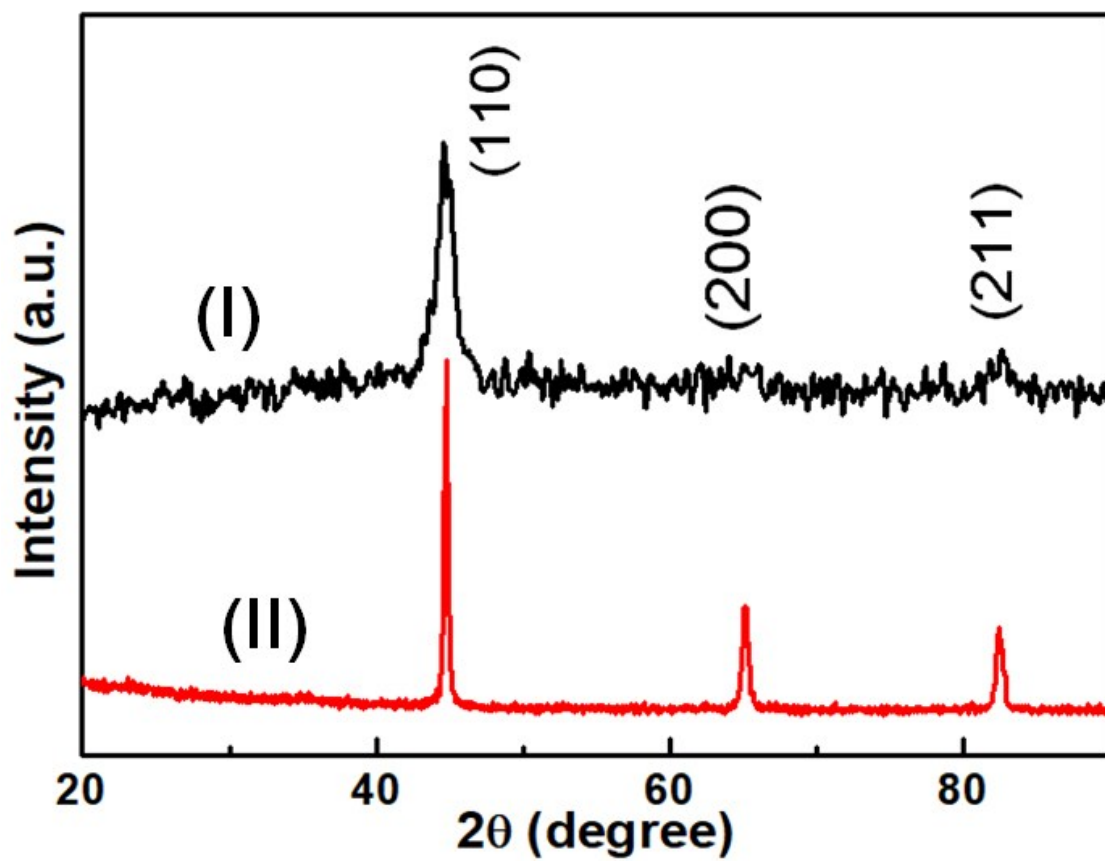

**Figure S6.** The XRD patterns of the plate-like MNZVI before (I) and after (II) immersion in the  $\text{Cr(VI)}$ -contained solution for 18 min. The indexes correspond to the diffraction of pure iron. (The initial  $\text{Cr(VI)}$  content: 100ppm; the MNZVI dosage:  $1.5 \text{ g}\cdot\text{L}^{-1}$ ).
